# Supplementary material for: Prenatal Arsenic Exposure and Birth Outcomes among a Population Residing near a Mining-Related Superfund Site
Source: PubMed Central journal article supplement (PMC4977047; doi:10.1289/ehp.1510070), 2016-02-09
Supplement: ehp.1510070.s001.acco.pdf [file ehp.1510070.s001.acco.pdf]

**Note to readers with disabilities:** *EHP* strives to ensure that all journal content is accessible to all readers. However, some figures and Supplemental Material published in *EHP* articles may not conform to [508 standards](#) due to the complexity of the information being presented. If you need assistance accessing journal content, please contact [ehp508@niehs.nih.gov](mailto:ehp508@niehs.nih.gov). Our staff will work with you to assess and meet your accessibility needs within 3 working days.

## **Supplemental Material**

### **Prenatal Arsenic Exposure and Birth Outcomes among a Population Residing near a Mining-Related Superfund Site**

Birgit Claus Henn, Adrienne S. Ettinger, Marianne R. Hopkins, Rebecca Jim, Chitra Amarasiriwardena, David C. Christiani, Brent A. Coull, David C. Bellinger, and Robert O. Wright

#### **Table of Contents**

**Table S1.** Adjusted associations of blood arsenic with birth outcomes

**Table S2.** Results from adjusted regression models evaluating interactions of arsenic with lead and manganese

**Table S3.** Adjusted associations of maternal and cord blood arsenic with birth outcomes, with and without accounting for measurement error using inverse variance weighting

**Table S1.** Adjusted associations<sup>a</sup> of blood arsenic with birth outcomes

| Exposure                      | Birth Weight (g) |                                | Gestational Age (weeks) |                                | Birth Weight for Gestational Age (z-score) |                                | Head Circumference (cm) |                                |
|-------------------------------|------------------|--------------------------------|-------------------------|--------------------------------|--------------------------------------------|--------------------------------|-------------------------|--------------------------------|
|                               | n                | Estimate (95% CI) <sup>b</sup> | n                       | Estimate (95% CI) <sup>b</sup> | n                                          | Estimate (95% CI) <sup>b</sup> | n                       | Estimate (95% CI) <sup>b</sup> |
| <b>Maternal blood arsenic</b> |                  |                                |                         |                                |                                            |                                |                         |                                |
| Quartile 1 <sup>c</sup>       | 151              | 0 (reference)                  | 151                     | 0 (reference)                  | 151                                        | 0 (reference)                  | 146                     | 0 (reference)                  |
| Quartile 2                    | 145              | -20.0<br>(-124.7, 84.8)        | 145                     | 0.02<br>(-0.27, 0.31)          | 145                                        | -0.06<br>(-0.27, 0.16)         | 138                     | 0.00<br>(-0.41, 0.41)          |
| Quartile 3                    | 151              | -78.4<br>(-182.4, 25.7)        | 151                     | -0.16<br>(-0.45, 0.13)         | 151                                        | -0.11<br>(-0.32, 0.10)         | 144                     | -0.44<br>(-0.85, -0.04)        |
| Quartile 4                    | 149              | -142.5<br>(-252.9, -32.2)      | 149                     | -0.41<br>(-0.72, -0.11)        | 149                                        | -0.21<br>(-0.43, 0.01)         | 146                     | -0.48<br>(-0.91, -0.05)        |
| Per IQR increase              | 596              | -77.5<br>(-127.8, -27.3)       | 596                     | -0.13<br>(-0.27, 0.01)         | 596                                        | -0.14<br>(-0.24, -0.04)        | 574                     | -0.22<br>(-0.42, -0.03)        |
| <b>Cord blood arsenic</b>     |                  |                                |                         |                                |                                            |                                |                         |                                |
| Quartile 1 <sup>d</sup>       | 139              | 0 (reference)                  | 139                     | 0 (reference)                  | 139                                        | 0 (reference)                  | 135                     | 0 (reference)                  |
| Quartile 2                    | 151              | 78.5<br>(-28.8, 185.8)         | 151                     | 0.30<br>(0.00, 0.59)           | 151                                        | 0.12<br>(-0.10, 0.33)          | 142                     | 0.34<br>(-0.08, 0.76)          |
| Quartile 3                    | 159              | -4.5<br>(-110.1, 101.0)        | 159                     | 0.17<br>(-0.12, 0.46)          | 159                                        | -0.02<br>(-0.23, 0.19)         | 152                     | -0.05<br>(-0.46, 0.37)         |
| Quartile 4                    | 139              | -34.6<br>(-146.1, 76.9)        | 139                     | 0.09<br>(-0.21, 0.40)          | 139                                        | -0.09<br>(-0.31, 0.13)         | 136                     | 0.00<br>(-0.44, 0.43)          |
| Per IQR increase              | 588              | -25.1<br>(-61.5, 11.4)         | 588                     | 0.01<br>(-0.09, 0.11)          | 588                                        | -0.05<br>(-0.13, 0.02)         | 565                     | -0.04<br>(-0.18, 0.10)         |

a – Models adjusted for maternal blood Pb and Mn (smoothed), maternal age at child’s birth (smoothed), infant sex, race/ethnicity, parity, smoking during pregnancy, maternal education, prenatal vitamin use, and maternal hemoglobin at delivery.

b – Effect estimates represent change in birth outcomes for (1) arsenic quartiles 2, 3, 4 compared to quartile 1, or (2) IQR increase in arsenic (continuous log<sub>e</sub>-transformed concentrations, scaled to the IQR).

c – Maternal blood arsenic quartile 1: < 0.97 µg/l, quartile 2: ≥ 0.97 to < 1.4 µg/l, quartile 3: ≥ 1.4 to < 2.3 µg/l, quartile 4: ≥ 2.3 µg/l. d – Cord blood arsenic quartile 1: < 1.8 µg/l, quartile 2: ≥ 1.8 to < 2.4 µg/l, quartile 3: ≥ 2.4 to < 3.4 µg/l, quartile 4: ≥ 3.4 µg/l.

**Table S2.** Results from adjusted regression models<sup>a</sup> evaluating interactions of arsenic with lead and manganese<sup>b</sup>.

| Model and Exposure                                          | Birth Weight (g) |                                   | Gestational Age (weeks) |                                  | Birth Weight for Gestational Age (z-score) |                                 | Head Circumference (cm) |                                 |
|-------------------------------------------------------------|------------------|-----------------------------------|-------------------------|----------------------------------|--------------------------------------------|---------------------------------|-------------------------|---------------------------------|
|                                                             | n                | Estimate (95% CI)                 | n                       | Estimate (95% CI)                | n                                          | Estimate (95% CI)               | n                       | Estimate (95% CI)               |
| <b>Model 1</b>                                              | 596              |                                   | 596                     |                                  | 596                                        |                                 | 574                     |                                 |
| Log <sub>e</sub> Maternal As, per IQR increase <sup>c</sup> |                  | -80.0<br>(-130.5, -29.6)          |                         | -0.13<br>(-0.27, 0.01)           |                                            | -0.14<br>(-0.25, -0.04)         |                         | -0.23<br>(-0.43, -0.03)         |
| Log <sub>e</sub> Maternal Pb                                |                  | 41.1<br>(-35.2, 117.5)            |                         | 0.14<br>(-0.07, 0.35)            |                                            | 0.05<br>(-0.10, 0.20)           |                         | 0.37<br>(0.07, 0.67)            |
| Maternal As * Pb                                            |                  | 31.9<br>(-43.8, 107.6)<br>p=0.41  |                         | -0.03<br>(-0.24, 0.18)<br>p=0.79 |                                            | 0.07<br>(-0.08, 0.22)<br>p=0.39 |                         | 0.10<br>(-0.20, 0.39)<br>p=0.52 |
| <b>Model 2</b>                                              | 596              |                                   | 596                     |                                  | 596                                        |                                 | 574                     |                                 |
| Log <sub>e</sub> Maternal As, per IQR increase              |                  | -79.0<br>(-131.2, -26.8)          |                         | -0.13<br>(-0.27, 0.02)           |                                            | -0.14<br>(-0.25, -0.04)         |                         | -0.26<br>(-0.46, -0.05)         |
| Log <sub>e</sub> Maternal Mn                                |                  | 56.7<br>(-67.6, 180.9)            |                         | 0.05<br>(-0.30, 0.39)            |                                            | 0.10<br>(-0.15, 0.35)           |                         | -0.61<br>(-1.1, -0.11)          |
| Maternal As * Mn                                            |                  | 12.9<br>(-102.2, 128.0)<br>p=0.83 |                         | -0.03<br>(-0.35, 0.29)<br>p=0.87 |                                            | 0.02<br>(-0.21, 0.25)<br>p=0.85 |                         | 0.24<br>(-0.21, 0.70)<br>p=0.29 |
| <b>Model 3</b>                                              | 588              |                                   | 588                     |                                  | 588                                        |                                 | 565                     |                                 |
| Log <sub>e</sub> Cord As, per IQR increase <sup>c</sup>     |                  | -24.5<br>(-61.5, 12.4)            |                         | 0.00<br>(-0.10, 0.10)            |                                            | -0.05<br>(-0.13, 0.02)          |                         | -0.03<br>(-0.18, 0.11)          |
| Log <sub>e</sub> Cord Pb                                    |                  | 31.6<br>(-76.0, 139.1)            |                         | 0.16<br>(-0.14, 0.46)            |                                            | 0.02<br>(-0.19, 0.24)           |                         | 0.27<br>(-0.15, 0.69)           |
| Cord As * Pb                                                |                  | 5.7<br>(-54.0, 65.4)<br>p=0.85    |                         | -0.05<br>(-0.22, 0.11)<br>p=0.54 |                                            | 0.02<br>(-0.10, 0.14)<br>p=0.74 |                         | 0.04<br>(-0.19, 0.27)<br>p=0.72 |
| <b>Model 4</b>                                              | 588              |                                   | 588                     |                                  | 588                                        |                                 | 565                     |                                 |
| Log <sub>e</sub> Cord As, per IQR increase                  |                  | -28.2<br>(-65.6, 9.2)             |                         | 0.01<br>(-0.10, 0.11)            |                                            | -0.06<br>(-0.13, 0.02)          |                         | -0.04<br>(-0.19, 0.10)          |

|                          |  |                                  |  |                                 |  |                                 |  |                                 |
|--------------------------|--|----------------------------------|--|---------------------------------|--|---------------------------------|--|---------------------------------|
| Log <sub>e</sub> Cord Mn |  | -146.7<br>(-324.8, 31.5)         |  | -0.07<br>(-0.56, 0.42)          |  | -0.31<br>(-0.67, 0.05)          |  | -0.69<br>(-1.4, 0.01)           |
| Cord As * Mn             |  | 39.0<br>(-61.5, 139.5)<br>p=0.45 |  | 0.00<br>(-0.28, 0.28)<br>p=0.99 |  | 0.09<br>(-0.11, 0.29)<br>p=0.39 |  | 0.07<br>(-0.32, 0.46)<br>p=0.74 |

a – Models adjusted for blood lead and manganese, mother’s age at delivery, child sex, race/ethnicity, parity, smoking during pregnancy, maternal education, prenatal vitamin use, and maternal hemoglobin at delivery. Lead and manganese centered at mean of log<sub>e</sub> distribution.

b – One interaction term included in each model.

c – Continuous log<sub>e</sub>-transformed arsenic concentrations, scaled to the IQR.

**Table S3.** Adjusted associations of maternal and cord blood arsenic with birth outcomes<sup>a</sup>, with and without accounting for measurement error using inverse variance weighting

| <b>Exposure</b>                                    | <b>Birth Weight (g)</b>              | <b>Gestational Age (weeks)</b>       | <b>Birth Weight for Gestational Age (z-score)</b> | <b>Head Circumference (cm)</b>       |
|----------------------------------------------------|--------------------------------------|--------------------------------------|---------------------------------------------------|--------------------------------------|
|                                                    | <b>Estimate (95% CI)<sup>b</sup></b> | <b>Estimate (95% CI)<sup>b</sup></b> | <b>Estimate (95% CI)<sup>b</sup></b>              | <b>Estimate (95% CI)<sup>b</sup></b> |
| Log <sub>e</sub> maternal As                       | -77.5 (-127.8, -27.3)                | -0.13 (-0.27, 0.01)                  | -0.14 (-0.24, -0.04)                              | -0.22 (-0.42, -0.03)                 |
| Weighted log <sub>e</sub> maternal As <sup>c</sup> | -77.1 (-126.7, -27.5)                | -0.16 (-0.31, -0.02)                 | -0.13 (-0.23, -0.03)                              | -0.27 (-0.47, -0.08)                 |
| Log <sub>e</sub> cord As                           | -25.1 (-61.5, 11.4)                  | 0.01 (-0.09, 0.11)                   | -0.05 (-0.13, 0.02)                               | -0.04 (-0.18, 0.10)                  |
| Weighted log <sub>e</sub> cord As <sup>d</sup>     | -14.7 (-49.5, 20.1)                  | 0.10 (0.01, 0.20)                    | -0.05 (-0.12, 0.02)                               | -0.01 (-0.12, 0.14)                  |

a – Each line in table represents separate model. Models include blood lead and manganese, mother’s age at delivery, child sex, race/ethnicity, parity, smoking during pregnancy, maternal education, prenatal vitamin use, and maternal hemoglobin at delivery.

b – Effect estimates represent change in birth outcomes per IQR increase in arsenic (continuous log<sub>e</sub>-transformed concentrations, scaled to the IQR).

c – Weighted by the inverse of the variance of the maternal blood arsenic measurement.

d – Weighted by the inverse of the variance of the umbilical cord blood arsenic measurement.
